# Supplementary material for: Poverty, partner discord, and divergent accounts; a mixed methods account of births before arrival to health facilities in Morogoro Region, Tanzania
Source: PubMed Central journal article supplement (PMC5039800; doi:10.1186/s12884-016-1058-x), 2016-09-27
Supplement: 12884_2016_1058_MOESM1_ESM.pdf [file 12884_2016_1058_MOESM1_ESM.pdf]

| <b>2. Interviewee's personal information.</b> |                                                                                                                   |                                                                                                                                                                                                                                                                                                                                                                                                                                                                                                                                                                                                                                        |
|-----------------------------------------------|-------------------------------------------------------------------------------------------------------------------|----------------------------------------------------------------------------------------------------------------------------------------------------------------------------------------------------------------------------------------------------------------------------------------------------------------------------------------------------------------------------------------------------------------------------------------------------------------------------------------------------------------------------------------------------------------------------------------------------------------------------------------|
| 201.                                          | When were you born? Please tell me the date, month and the year you were born                                     | -----/-----/-----                                                                                                                                                                                                                                                                                                                                                                                                                                                                                                                                                                                                                      |
| 202.                                          | What is your age, in terms of years?<br><br><b>COMPARE AND THEN CORRECT 201 AND/OR 202 TO ENSURE CONSISTENCY.</b> | Write down the age, in terms of years [ ]                                                                                                                                                                                                                                                                                                                                                                                                                                                                                                                                                                                              |
| 203.                                          | What is your religion?                                                                                            | 1. Christian<br>2. Muslim<br>3. Hindu<br>4. Budha<br>5. Others (Mention) _____ [ ]                                                                                                                                                                                                                                                                                                                                                                                                                                                                                                                                                     |
| 204.                                          | What is your tribe?                                                                                               | 1. Luguru<br>2. Kaguru<br>3. Pogoro<br>4. Ndamba<br>5. Others (Mention) _____ [ ]                                                                                                                                                                                                                                                                                                                                                                                                                                                                                                                                                      |
| 205.                                          | What activity are you engaged in to earn living?                                                                  | <b>Agriculture</b><br>1. Crops / Animal keeping<br>2. Fishing<br><b>Employed</b><br>3. Government and other institutions<br>4. Private sector<br><b>Self employed (Not in agriculture/Animal keeping)</b><br>5. Has employed other people<br>6. Has not employed anyone<br>7. S/he is involved in family projects (non-agricultural projects) without gaining any payment(s).<br><b>Not working</b><br>8. S/he is ready to work<br>9. S/he is not ready to work<br>10. Dealing with domestic activities/housewife<br>11. Student<br>12. Can not work (Old age, retired, sick, disabled)<br>13. Other activities<br>(Mention) _____ [ ] |
| 206.                                          | What is your relationship with the head of this household?                                                        | 1. Head of household<br>2. Wife<br>3. Daughter<br>4. In-law (Married)<br>5. Grand daughter<br>6. Mother<br>7. Mother in-law<br>8. Sister<br>9. Sister in law<br>10. Relative<br>11. Adopted/step daughter<br>12. Domestic servant [ ]                                                                                                                                                                                                                                                                                                                                                                                                  |

|      |                                                                                                                                                                                                                                                           |                                                                                                                                                                                                                                                                                                                                                                                                                                                                                                                                                                                                                             |     |
|------|-----------------------------------------------------------------------------------------------------------------------------------------------------------------------------------------------------------------------------------------------------------|-----------------------------------------------------------------------------------------------------------------------------------------------------------------------------------------------------------------------------------------------------------------------------------------------------------------------------------------------------------------------------------------------------------------------------------------------------------------------------------------------------------------------------------------------------------------------------------------------------------------------------|-----|
|      |                                                                                                                                                                                                                                                           | 13. Friend<br>14. Others-not relatives based: (Mention)                                                                                                                                                                                                                                                                                                                                                                                                                                                                                                                                                                     |     |
| 207. | What is the head of household doing to earn the living? (income generating activity done by the head of household)                                                                                                                                        | <b>Agriculture</b><br>1. Crops / Animal keeping<br>2. Fishing<br><b>Employed</b><br>3. Government and other parastatals<br>4. Private sector<br><b>Self employed (Not in agriculture/Animal keeping)</b><br>5. Has employed other people<br>6. Has not employed anyone<br>7. S/he is involved in family projects (non-agricultural projects) without gaining any payment(s).<br><b>Not working</b><br>8. S/he is ready to work<br>9. S/he is not ready to work<br>10. Dealing with domestic activities/housewife<br>11. Student<br>12. Can not work (Old age, retired, sick, disabled)<br>13. Other activities<br>(Mention) | [ ] |
| 208. | Have you ever been to school for formal education?                                                                                                                                                                                                        | 1. Yes<br>2. No ( <b>GO TO QUESTION 210</b> )                                                                                                                                                                                                                                                                                                                                                                                                                                                                                                                                                                               | [ ] |
| 209. | What is your level of education?<br>That is ,how many years did you spend in school or college/university?                                                                                                                                                | Write down the number of years spent in attending school or college/university.                                                                                                                                                                                                                                                                                                                                                                                                                                                                                                                                             | [ ] |
| 210. | Now, i request you to read the following sentence.<br><br><b>SHOW THE CARD WITH THAT PARTICULAR SENTENCE TO THAT PARTICIPANT. IF THE PARTICIPANT CAN NOT READ THE WHOLE SENTENCE, INVESTIGATE:</b> Can you read any part or any words from this sentence? | 1. Was able to read the whole sentence<br>2. Was able to read some parts of that sentence<br>3. can not read the given sentence<br>4. Blind/has eye(s) problems                                                                                                                                                                                                                                                                                                                                                                                                                                                             | [ ] |
| 211. | Are you currently married or do you live with any man in any marital relationship?                                                                                                                                                                        | <b>1. Yes (GO TO QUESTION 213)</b><br>2. No                                                                                                                                                                                                                                                                                                                                                                                                                                                                                                                                                                                 | [ ] |
| 212. | <b>If NO</b> , what type of marital relationship are you currently in? Widow, divorced, separated from your partner?                                                                                                                                      | 1. Widow<br>2. Divorced<br>3. Separated from my partner<br><b>4. Never been married – GO TO QUESTION 215</b>                                                                                                                                                                                                                                                                                                                                                                                                                                                                                                                | [ ] |
| 213. | Has your husband or your partner got formal school education?                                                                                                                                                                                             | 1. Yes<br>2. No<br>9. I don't know/I don't remember                                                                                                                                                                                                                                                                                                                                                                                                                                                                                                                                                                         | [ ] |
| 214. | What is the education level of your husband or partner?                                                                                                                                                                                                   | Mention the years spent in school                                                                                                                                                                                                                                                                                                                                                                                                                                                                                                                                                                                           | [ ] |

|                                                                       |                                                                                                                                                                                                                   |                                                                                                                                                                                                                                                                                                                                                                                                                                                                                                                                                                                                               |     |
|-----------------------------------------------------------------------|-------------------------------------------------------------------------------------------------------------------------------------------------------------------------------------------------------------------|---------------------------------------------------------------------------------------------------------------------------------------------------------------------------------------------------------------------------------------------------------------------------------------------------------------------------------------------------------------------------------------------------------------------------------------------------------------------------------------------------------------------------------------------------------------------------------------------------------------|-----|
| 215.                                                                  | How old were you when you became pregnant for the first time?                                                                                                                                                     | Years _____                                                                                                                                                                                                                                                                                                                                                                                                                                                                                                                                                                                                   | [ ] |
| <b>Please let me ask you few questions concerning your household.</b> |                                                                                                                                                                                                                   |                                                                                                                                                                                                                                                                                                                                                                                                                                                                                                                                                                                                               |     |
| 216.                                                                  | What is the main source of drinking water and water for other uses in your household?                                                                                                                             | <ol style="list-style-type: none"> <li>1. Tap water,, available inside the house</li> <li>2. Tap water, available outside the house</li> <li>3. Tap water, from the community water supply.</li> <li>4. Open water well, found outside the house</li> <li>5. Open well for community uses</li> <li>7. Constructed water well, located outside the house</li> <li>8.Springs/Rivers/water channels/pond/lake</li> <li>9. Other (Mention)_____</li> </ol>                                                                                                                                                        | [ ] |
| 217.                                                                  | Is your household with the toilet?                                                                                                                                                                                | <ol style="list-style-type: none"> <li>1.Yes</li> <li>2.No (<b>GO TO QUESTON 219</b>)</li> </ol>                                                                                                                                                                                                                                                                                                                                                                                                                                                                                                              | [ ] |
| 218.                                                                  | If yes, what type of toilet is it?                                                                                                                                                                                | <ol style="list-style-type: none"> <li>1. Toilet not using water to flash waste materials (not shared one).</li> <li>2. Toilet using water to flash waste materials (shared with other household(s))</li> <li>3. Pit latrine,allowing air in but not shared with other household(s).</li> <li>4. Pit latrine, allowing air in and shared with other households.</li> <li>5. Toilet constructed under traditional settings but not shared with other households</li> <li>6. Toilet constructed under traditional settings and shared with other households</li> <li>7. other type(s) (Mention)_____</li> </ol> | [ ] |
| 219.                                                                  | What are the materials used to roof the house where the head of this household lives in?<br><br><b>(INVESTIGATE AND KEEP THE RECORD OF THINGS YOU WILL SEE)</b>                                                   | <ol style="list-style-type: none"> <li>1. Grasses/ Leaves/ Soil</li> <li>2. Roofing iron sheets</li> <li>3. Tiles</li> <li>4. Cement</li> <li>5. Asbestos</li> <li>6. Another type (Mention)_____</li> </ol>                                                                                                                                                                                                                                                                                                                                                                                                  | [ ] |
| 220.                                                                  | What is are the materials used to make the walls of that house?<br><br><b>(KEEP THE RECORD OF THE THINGS YOU WILL SEE. IN CASE MORE THAN ONE MATERIAL HAS BEEN USED, SHOW THAT ONE THAT HAS BEEN USED MAINLY)</b> | <ol style="list-style-type: none"> <li>1. Trees and soil</li> <li>2. building blocks made using soil</li> <li>3. building blocks burnt in furnaces</li> <li>4. Timber</li> <li>5. Cement blocks</li> <li>6. Stones</li> <li>7. other materials (mention) _____</li> </ol>                                                                                                                                                                                                                                                                                                                                     | [ ] |
| 221.                                                                  | What are materials used in making the floor of that house?<br><b>(INVESTIGATE AND KEEP THE RECORD OF THE THINGS YOU WILL SEE)</b>                                                                                 | <ol style="list-style-type: none"> <li>1. Soil/Sand</li> <li>2. Animal secretions</li> <li>3. Wood planks/bamboo trees</li> <li>4. Polished timber</li> <li>5. Ceramic</li> </ol>                                                                                                                                                                                                                                                                                                                                                                                                                             | [ ] |



|      |                                                                                                                                                                                                                                                                                                                           |                                                                                                                                              |                   |
|------|---------------------------------------------------------------------------------------------------------------------------------------------------------------------------------------------------------------------------------------------------------------------------------------------------------------------------|----------------------------------------------------------------------------------------------------------------------------------------------|-------------------|
|      | moment?                                                                                                                                                                                                                                                                                                                   |                                                                                                                                              |                   |
| 304. | If yes, how many sons that you are not living with currently?<br>How many daughters that you are not living with at this time?                                                                                                                                                                                            | The number of male children living far<br>The number of female children living far.<br><br><b>IF NO CHILDREN LIVING FAR AWAY, WRITE '00'</b> | [ ]<br>[ ]<br>[ ] |
| 305. | <b>REFER QUESTIONS NUMBER: (302 + 304), COMPARE AND THEN CORRECT TO CONFIRM THE REAL TOTAL NUMBER OF CHILDREN</b><br><br>Currently you have _____ living children.                                                                                                                                                        | 1.yes<br>2.No                                                                                                                                | [ ]               |
| 306. | Have you ever given birth to a living child who died later?<br><br><b>IF THE ANSWER IS NO PROBE: ANY CHILD WHO CRIED OR SHOWED SIGNS OF LIFE IMMEDIATELY AFTER BIRTH BUT DIED AFTER HOURS OR FEW DAYS.</b>                                                                                                                | 1. Yes<br>2.No ( <b>Go to question 308</b> )                                                                                                 | [ ]               |
| 307. | How many male children of yours have died so far?<br>How many female children of yours have died so far?                                                                                                                                                                                                                  | <b>IF NO CHILDREN HAVE DIED, WRITE '00'</b>                                                                                                  | M[ ]<br>F[ ]      |
| 308. | Some pregnancies could face various intra utero damages or abortions. Some could cause a woman to deliver prematurely or to give birth to a dead baby who has no any signs of life.<br><br>Have you ever faced any of the above situations at different moments of your pregnancies such as giving birth to a dead child? | 1.Yes<br>2.No ( <b>Go to question 310</b> )                                                                                                  | [ ]               |
| 309. | How many times have these incidences of abortions or giving birth prematurely have happened to you?                                                                                                                                                                                                                       | Number of such incidences _____                                                                                                              | [ ]               |
| 310. | Add answers from questions 305, 307, and 309 so that you get the total number of pregnancies and then write on the space given on the right side.                                                                                                                                                                         | Total number of pregnancies                                                                                                                  | [ ]               |
| 311. | <b>REFER TO QUESTIONS: (305 + 307 + 309) AND COMPARE AND CORRECT TO CONFIRM THE INTERVIEW ON THE NUMBER OF CHILDREN.</b><br><br>For now you have _____ children (Question number 305)<br>a number children who died _____                                                                                                 | 1.Yes<br>2.No                                                                                                                                | [ ]               |

|                                                                                                                               |  |  |
|-------------------------------------------------------------------------------------------------------------------------------|--|--|
| (Question 307)<br>number of pregnancies delivered<br>prematurely _____ (Question 309)<br>Is given information above correct ? |  |  |
|-------------------------------------------------------------------------------------------------------------------------------|--|--|

| <b>Please tell me about your last pregnancy</b> |                                                                                                                                                                                               |                                                                                                                                                                                                                       |                                               |
|-------------------------------------------------|-----------------------------------------------------------------------------------------------------------------------------------------------------------------------------------------------|-----------------------------------------------------------------------------------------------------------------------------------------------------------------------------------------------------------------------|-----------------------------------------------|
| 312.                                            | How many months did your last pregnancy last?<br><br><b>WROTE DOWN IN TERMS OF COMPLETE MONTHS.</b>                                                                                           | <b>Write down the pregnancy age _____</b><br><b>(IF IT IS LESS THAN 7 MONTHS ,GO TO QUESTION 318;OTHERWISE ASK THE NEXT QUESTION)</b>                                                                                 | [ ]                                           |
| 313.                                            | How many children did you deliver during your last pregnancy                                                                                                                                  | Write the total number of children _____                                                                                                                                                                              |                                               |
| 314.                                            | Did that child/children cry, get any shaking of the body or breath after birth?                                                                                                               | Child 1 1= Yes, 2 = No 9 = I don't remember<br>child 2 1= Yes, 2 = No 9 = I don't remember<br>child 3 1= Yes, 2 = No 9 = I don't remember                                                                             | [ ]<br>[ ]<br>[ ]                             |
| 315.                                            | Is that child/children still alive?                                                                                                                                                           | Child 1 1= yes, 2 = no 9 = I don't remember<br>child 2 1= yes, 2 = no 9 = I don't remember<br>child 3 1= yes, 2 = no 9 = I don't remember<br><b>IF NO GO TO QUESTION 317</b>                                          | [ ]<br>[ ]<br>[ ]                             |
| 316.                                            | If s/he or they are there alive: (NAME) what is her/his age?                                                                                                                                  | Child 1: Months[ ] days [ ]<br>child 2: Months[ ] days[ ] total numbe of days<br>child 3: Months[ ] days[ ]<br><b>Go to question 318</b>                                                                              | [ ]<br>[ ]<br>[ ]                             |
| 317.                                            | Did you at any time see a health expert so that he/she investigates about your health when you were pregnant                                                                                  | 1. Yes ( <b>GO TO QUESTION 320</b> )<br>2. No<br>9. s/he has refused to respond                                                                                                                                       | [ ]                                           |
| 319.                                            | If you met the health expert for investigations into your heath when you were pregnant, where did you get him/her?<br><br>1=YES, HE/SHE MENTIONED<br>2=NO/SHE DID NOT MENTION                 | A. Morogoro regional hospital<br>B. another hospital _____<br>C. health center _____<br>D. dispensary _____<br>E. pharmacy _____<br>F. traditional birth attendant<br>G. other heathl services centers, mention _____ | [ ]<br>[ ]<br>[ ]<br>[ ]<br>[ ]<br>[ ]<br>[ ] |
| 320.                                            | If you went to the anti natal clinic for investigations into your health, at least once, please answer the following questions about the investigation(s ) that was done to you when you were | A. Was you weight measured?<br>B. Was your height measured?<br>C. Was your blood taken for investigations?<br>D. Was your blood pressure measured/taken?<br>E. Were urine investigations done?                        | [ ]<br>[ ]<br>[ ]<br>[ ]<br>[ ]               |

|      |                                                                           |                                                                                                                                                                                                                                                                                                                                                                                                                                                                                                                                                                                                                                                                       |                                                      |
|------|---------------------------------------------------------------------------|-----------------------------------------------------------------------------------------------------------------------------------------------------------------------------------------------------------------------------------------------------------------------------------------------------------------------------------------------------------------------------------------------------------------------------------------------------------------------------------------------------------------------------------------------------------------------------------------------------------------------------------------------------------------------|------------------------------------------------------|
|      | pregnant<br><br>READ THE ANSWERS, WRITE<br>1=YES<br>2=NO                  | F. Was your abdomen checked by palpation?<br>G. Were you told of any signs of danger throughout the period of your pregnancy?<br>H. Were you told were to go, in case of any health problem throughout the period of your pregnancy ?<br>I. Were you given counselling with regard to HIV testing ?<br>J. Did you have discussions on the mother to child transmission of HIV ?<br>K. Were you given counselling regarding family planning ?<br>L. Were you given mosquito net discount card?<br>M. Did you have discussions on the preparations for delivery?<br>N. Did you have discussions on breastfeeding of the baby continually without mixing any other food? | [ ]<br>[ ]<br>[ ]<br>[ ]<br>[ ]<br>[ ]<br>[ ]<br>[ ] |
| 321. | How old was your pregnancy when you went to the clinic for first time?    | Months _____                                                                                                                                                                                                                                                                                                                                                                                                                                                                                                                                                                                                                                                          | [ ]                                                  |
| 322. | How old was your pregnancy when you went to the clinic for the last time? | Months _____                                                                                                                                                                                                                                                                                                                                                                                                                                                                                                                                                                                                                                                          | [ ]                                                  |
| 323. | How many time did you attend ante natal clinic throughout that pregnancy? | Total number of visits to the clinic _____<br>99= she doesn't know<br><b>IF IT IS MORE THAN 3 TIMES, GO TO 327</b>                                                                                                                                                                                                                                                                                                                                                                                                                                                                                                                                                    | [ ]                                                  |

#### 4 Health problems during delivery/intra-utero fetal death(s)

Now i request to ask you about the problems you faced during pregnancies

|     |                                                                                                                                                                                                                |                                                                                                                                                                                                                                                                                                                                                                                                                                                                                                                               |     |
|-----|----------------------------------------------------------------------------------------------------------------------------------------------------------------------------------------------------------------|-------------------------------------------------------------------------------------------------------------------------------------------------------------------------------------------------------------------------------------------------------------------------------------------------------------------------------------------------------------------------------------------------------------------------------------------------------------------------------------------------------------------------------|-----|
| 401 | Where was the delivery of your baby conducted?<br><br><b><i>IF SHE DOES NOT KNOW WEATHER IT WAS THE HOSPITAL, HEALTH CENTRE, OR GOVERNMENT CLINIC OR PRIVATE ONE: WRITE DOWN THE NAME OF WHERE SHE IS.</i></b> | 1. Morogoro regiona hospital ( <b>GO TO 403</b> )<br>2. Other hospitals (Mention) _____ ( <b>GO TO 403</b> )<br>3. Health center (Mention) _____ ( <b>GO TO 403</b> )<br>4. Dispensary (mention) _____ ( <b>GO TO 403</b> )<br>5. Pharmacy ( <b>NENDA 403</b> )<br>6. Anther centre for health services (Mention) _____ ( <b>GO TO 403</b> )<br>7. At the home of the traditional birth attendant<br>8. At my home?<br>9. At the home of the community health worker<br>10. At the home of somebody else<br>11. Along the way | [ ] |
|-----|----------------------------------------------------------------------------------------------------------------------------------------------------------------------------------------------------------------|-------------------------------------------------------------------------------------------------------------------------------------------------------------------------------------------------------------------------------------------------------------------------------------------------------------------------------------------------------------------------------------------------------------------------------------------------------------------------------------------------------------------------------|-----|

|     |                                                                                                                                                                                               |                                                                                                                                                                                                                                                                                                                                                                                                                                                                                                                                                                                                                                                                                                                                                                 |                                                                                                                                                                                                                                                                                                                                                 |
|-----|-----------------------------------------------------------------------------------------------------------------------------------------------------------------------------------------------|-----------------------------------------------------------------------------------------------------------------------------------------------------------------------------------------------------------------------------------------------------------------------------------------------------------------------------------------------------------------------------------------------------------------------------------------------------------------------------------------------------------------------------------------------------------------------------------------------------------------------------------------------------------------------------------------------------------------------------------------------------------------|-------------------------------------------------------------------------------------------------------------------------------------------------------------------------------------------------------------------------------------------------------------------------------------------------------------------------------------------------|
| 402 | <p>If you did not deliver at the health centre, what was the reason(s)?<br/> <b>1= she has mentioned; 2=she has not mentioned</b><br/><br/> <i>(don't read out the answers but probe)</i></p> | <p>A. A distance and high cost for transport<br/>                 B. time for services does not correspond with schudule<br/>                 C. Unpleasant behavior shown by health provider<br/>                 D. Inappropriate attitude of the health care provider<br/>                 E. Lack of confidentiality<br/>                 F. Lack of medications<br/>                 G. Long waiting time<br/>                 H. High costs of the required service(s)<br/>                 I. Religious reason(s)<br/>                 J. There is no any benefit(s)<br/>                 K. I did not know the importance of doing so<br/>                 L. I did not the permission to do so<br/>                 N. any other reasons (mention)</p> | <p>[ ]<br/>                 [ ]</p> |
| 403 | <p>Who helped you at the time of delivery?<br/><br/> <b>(DO NOT READ OUT THE ANSWERS BUT PROBE OR ASK: OTHER REASON(S)? 1= SHE MENTIONED 2= SHE DID NOT MENTION)</b></p>                      | <p>A. Heath worker at the dispensary<br/>                 B. Health worker at the health center<br/>                 C. Health worker in the hospital<br/>                 D. Health worker in the village<br/>                 E. Traditional healer<br/>                 F. Traditional birth attendant<br/>                 G. Brother/sister/friend/neighbour<br/>                 H. Another one<br/>                 I. She doesn't know/she doesn't remember</p>                                                                                                                                                                                                                                                                                         | <p>[ ]<br/>                 [ ]</p>                                                                                                                              |

|                                                                                                                                                   |                                                                                                                                                                                                                                                                                                                                                             |                                                                                                                   |                                                              |
|---------------------------------------------------------------------------------------------------------------------------------------------------|-------------------------------------------------------------------------------------------------------------------------------------------------------------------------------------------------------------------------------------------------------------------------------------------------------------------------------------------------------------|-------------------------------------------------------------------------------------------------------------------|--------------------------------------------------------------|
| <p><b>5 Newborn health</b><br/> <b>Now, i would like to ask you the questions concerning things that were done immediately after delivery</b></p> |                                                                                                                                                                                                                                                                                                                                                             |                                                                                                                   |                                                              |
| 501.                                                                                                                                              | <p>Was the baby/babies born with bigger size, bigger size than normal, average size, smaller size than average, a very small size?<br/><br/> <b>1. BIGGER SIZE</b><br/> <b>2. BIGGER SIZE THAN NORMAL</b><br/> <b>3. AVERAGE SIZE</b><br/> <b>4. SMALLER SIZE THAN AVERAGE</b><br/> <b>5. A VERY SMALL SIZE THAN NORMAL</b><br/> <b>9. I DON'T KNOW</b></p> | <p>Baby 1<br/>                 Baby 2<br/>                 Baby 3</p>                                             | <p>[ ]<br/>                 [ ]<br/>                 [ ]</p> |
| 502.                                                                                                                                              | <p>Was that baby/those babies' (Name/Names) weights measured after delivery.</p>                                                                                                                                                                                                                                                                            | <p>1=yes<br/>                 2= no (<b>GO TO 504</b>)<br/>                 9= she cant say/She does not know</p> | <p>[ ]</p>                                                   |



|      |                                                                                                                                                                                                       |                                                                                                                                                                                                                                                                                                                                                                                                                                                                                                                                                                                                                                                                                   |                                                                                                                                    |
|------|-------------------------------------------------------------------------------------------------------------------------------------------------------------------------------------------------------|-----------------------------------------------------------------------------------------------------------------------------------------------------------------------------------------------------------------------------------------------------------------------------------------------------------------------------------------------------------------------------------------------------------------------------------------------------------------------------------------------------------------------------------------------------------------------------------------------------------------------------------------------------------------------------------|------------------------------------------------------------------------------------------------------------------------------------|
| 503. | <p>If yes, what was the baby/each baby's weight?<br/> <b>WRITE DOWN THE WEIGHT IN KILOGRAMS AS SHOWN IN THE CLINIC CARDS OF THOSE BABIES , IF THEY WILL BE AVAILABLE</b></p>                          | <p>baby 1 _____ kg<br/>                 baby 2 _____ kg<br/>                 baby 3 _____ kg<br/>                 9.</p>                                                                                                                                                                                                                                                                                                                                                                                                                                                                                                                                                          | <p>[   ]<br/>                 [   ]<br/>                 [   ]</p>                                                                 |
| 504. | <p>If the baby was born before time (premature), or if was born with low birth weight, were you give any advice?</p>                                                                                  | <p>1. Yes<br/>                 2. No<br/>                 3. The bay was not born before normal time /did not have low birth weight.<b>GO TO 506</b></p>                                                                                                                                                                                                                                                                                                                                                                                                                                                                                                                          | <p>[   ]</p>                                                                                                                       |
| 505. | <p>What advice were you given?<br/><br/> <b>DON'T READ OUT ALL ANSWERS FOR HER</b><br/><br/> <b>1=SHE HAS MENTIONED</b><br/> <b>2=SHE HAS NOT MENTIONED</b></p>                                       | <p>A. Give warmth to the baby by resting him/her on your chest so that you touch each other through skin contacts (Kangaroo Mother Care).<br/>                 B. The baby should be dressed in hut and socks.<br/>                 C. Breastfeed the baby regularly, after every 2-3 hours during the day and night<br/>                 D. If the baby still can not suck the milk well for a long time, you can milk the breast/squeeze out your own milk using a cup to make sure that the baby gets that first yellowish milk.<br/>                 E. Breast milk is the best food among all foods to ensure the baby gains good weight.</p>                                | <p>A.[   ]<br/>                 B.[   ]<br/>                 C.[   ]<br/>                 D.[   ]<br/>                 E.[   ]</p> |
| 506. | <p>What was the first thing to be done to the newborn (or the first born) immediately after birth?<br/><br/> <b>PROBE DEEPLY ESPECAILLYT IN CASE OF TWINS</b><br/><br/> <b>ENCYCLE ONE ANSWER</b></p> | <p>1. Cutting the cord<br/>                 2. To place the baby on the mother's chest/mother's abdomen.<br/>                 3. Baby was left alone.<br/>                 4. Baby was cleaned using a piece of cloth (in order to dry the some water/moisture))<br/>                 5. Baby was covered using clothes<br/>                 6. Baby was bathed<br/>                 7. Baby was left to sleep<br/>                 8. Baby was breastfed<br/>                 9. Baby was given water with sugar or any other thing to eat/drink<br/>                 10. 98=other thing (mention) _____<br/>                 11. 99=she doesn't know/ she doesn't remember.</p> | <p>[   ]</p>                                                                                                                       |
| 507. | <p>Was the baby dried up in order to remove the watery moisture from his/her body?</p>                                                                                                                | <p>1=Yes<br/>                 2=No (<b>GO TO 509</b>)</p>                                                                                                                                                                                                                                                                                                                                                                                                                                                                                                                                                                                                                         | <p>[   ]</p>                                                                                                                       |
| 508. | <p>If yes, was the baby dried up before or after coming out of the placenta?</p>                                                                                                                      | <p>4 Before coming out of the placenta<br/>                 5 After coming out of the placenta<br/>                 9. She doesn't know/she doesn't remember.</p>                                                                                                                                                                                                                                                                                                                                                                                                                                                                                                                 | <p>[   ]</p>                                                                                                                       |
| 509. | <p>Was the baby covered with clothes after delivery</p>                                                                                                                                               | <p>1=Yes<br/>                 2= No (<b>NENDA 511</b>)<br/>                 9= she doesn't know/she doesn't remember (<b>Go to 511</b>)</p>                                                                                                                                                                                                                                                                                                                                                                                                                                                                                                                                       | <p>[   ]</p>                                                                                                                       |

|      |                                                                                                                             |                                                                                                                            |     |
|------|-----------------------------------------------------------------------------------------------------------------------------|----------------------------------------------------------------------------------------------------------------------------|-----|
| 510. | If yes, was the baby covered with clothes before or after the coming out of placenta?                                       | 1. 1. Before coming out of the placenta<br>2. After coming out of the placenta<br>9. She doesn't know/she doesn't remember | [ ] |
| 511. | Did your baby cry spontaneously after delivery?                                                                             | 1=Yes <b>GO TO 514)</b><br>2= No                                                                                           | [ ] |
| 512. | If the baby didn't cry immediately, was there anything that was done to the baby to make him/her cry/breath after delivery? | 1=Yes<br>2= No <b>GO TO 514)</b>                                                                                           | [ ] |
| 513. | If yes, what was done to make the baby cry or breath?                                                                       |                                                                                                                            | [ ] |
| 514. | What was the time duration post delivery when the baby was breastfed?                                                       | minutes _____<br>hours _____<br>days _____<br><b>(write down the total number of minutes)</b><br>I don't know= 00          |     |
| 515. | Was the baby breastfed on the initial mother's yellowish milk?                                                              | 1=Yes<br>2= No<br>9= she cant say/she doesn't know                                                                         | [ ] |

| <b>Newborn babies' health problems</b> |                                                                                                                                                                                       |                                                                                                                                                                                                                                                                                                                                                                                                                                                           |                                                                                                                     |
|----------------------------------------|---------------------------------------------------------------------------------------------------------------------------------------------------------------------------------------|-----------------------------------------------------------------------------------------------------------------------------------------------------------------------------------------------------------------------------------------------------------------------------------------------------------------------------------------------------------------------------------------------------------------------------------------------------------|---------------------------------------------------------------------------------------------------------------------|
| 524                                    | Did your baby get sick within a month of delivery?                                                                                                                                    | 1=Yes<br>2= No( <b>NENDA 601</b> )<br>9= He/she does not know.( <b>NENDA 601</b> )                                                                                                                                                                                                                                                                                                                                                                        | [ ]                                                                                                                 |
| 525                                    | If yes, did the community health worker advise you to go to health facility to get proper treatment?                                                                                  | 1=Yes<br>2= No                                                                                                                                                                                                                                                                                                                                                                                                                                            |                                                                                                                     |
| 526                                    | If a baby got sick within a month of delivery, what was the sickness?<br><br><b>( DO NOT READ OUT ANSWERS. PROBE FOR MORE ANSWERS. ASK: OTHER? MARK 1= MENTIONED 2= NOT MENTIONED</b> | A. Baby could not suck the mother's milk.<br>B. Diarrhoea<br>C. Pus in the navel<br>D. A navel becomes reddish.<br>E. Eyes were reddening<br>F. High fever<br>G.<br>H. Lowering of the baby's body temperature<br>I. convulsion<br>J. Burning-like skin effect<br>K. Failure to breath or to cry<br>L. Fast breathing<br>M. Difficulty in breathing<br>N. Failure to urinate<br>O. Failure to defecate<br>P. Cough and flue<br>98. Other (Mention ) _____ | [ ]<br>[ ] |
